# Supplementary material for: A distinctive and proficient fluorescent switch for ratiometric recognition of the menacing cyanide ion: biological studies on MDA-MB-231 cells
Source: Royal Society of Chemistry journal article supplement (doi:10.1039/d4ay01676a), 2024-01-01
Supplement: d4ay01676a1.pdf [file d4ay01676a1.pdf]

## **A distinctive and proficient fluorescent switch for ratiometric recognition of the menacing cyanide ion: Biological studies on MDA-MB-231 cells**

Amitav Biswas<sup>a</sup>, Saswati Gharami<sup>\*a</sup>, Atanu Maji<sup>a</sup>, Subhabrata Guha<sup>b</sup>, Gaurav Das<sup>b</sup>, Rahul Naskar<sup>a</sup> and Tapan Kumar Mondal<sup>\*a</sup>

<sup>a</sup>*Department of Chemistry, Jadavpur University, Kolkata-700 032, India.*

*E-mail: [tapank.mondal@jadavpuruniversity.in](mailto:tapank.mondal@jadavpuruniversity.in) ; [saswatiju91@gmail.com](mailto:saswatiju91@gmail.com)*

<sup>b</sup>*Department of Signal Transduction and Biogenesis Amines (STBA), Chittaranjan National Cancer Institute, Kolkata- 700026, India.*

### **CONTENTS**

- 1. <sup>1</sup>H-NMR of BOHB.....**
- 2. <sup>13</sup>C-NMR of BOHB.....**
- 3. IR plot of BOHB.....**
- 4. HRMS of BOHB.....**
- 5. <sup>1</sup>H-NMR of BOHB-CN<sup>-</sup>.....**
- 6. UV Study.....**
- 7. Emission Study.....**
- 8. Mole ratio plot.....**
- 9. Determination of detection limit.....**
- 10. pH Study of BOHB and BOHB-CN<sup>-</sup>.....**
- 11. Stability study of BOHB and BOHB-CN<sup>-</sup>.....**
- 12. Determination of Quantum yield.....**

**Table S1: Lifetime decay profile of BOHB and BOHB-CN<sup>-</sup>**

**Table S2: The comparison of the present probe (BOHB) with some previous probes for CN<sup>-</sup>**

## 1. $^1\text{H}$ NMR spectrum of BOHB

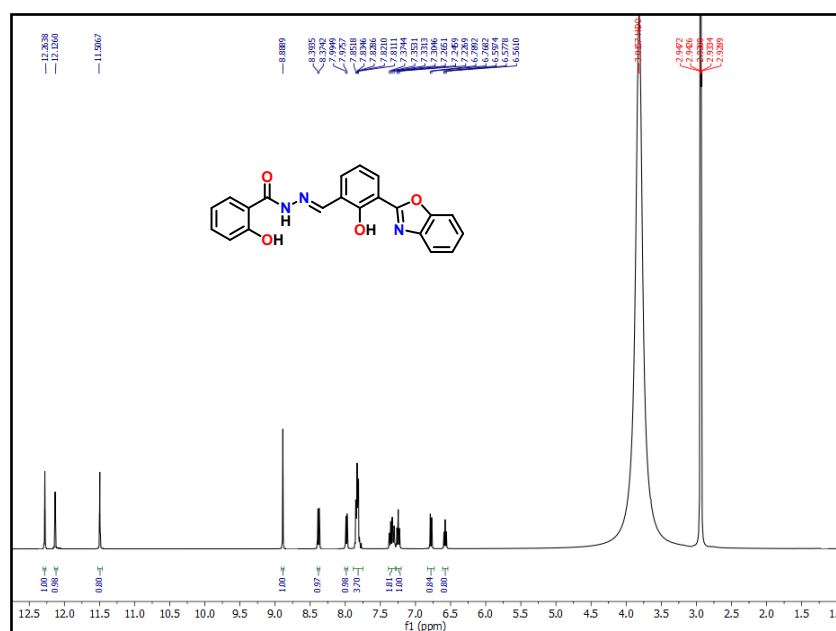

Figure S1:  $^1\text{H}$  NMR (400 MHz) spectrum of the probe (BOHB) in DMSO- $d_6$

## 2. $^{13}\text{C}$

NMR

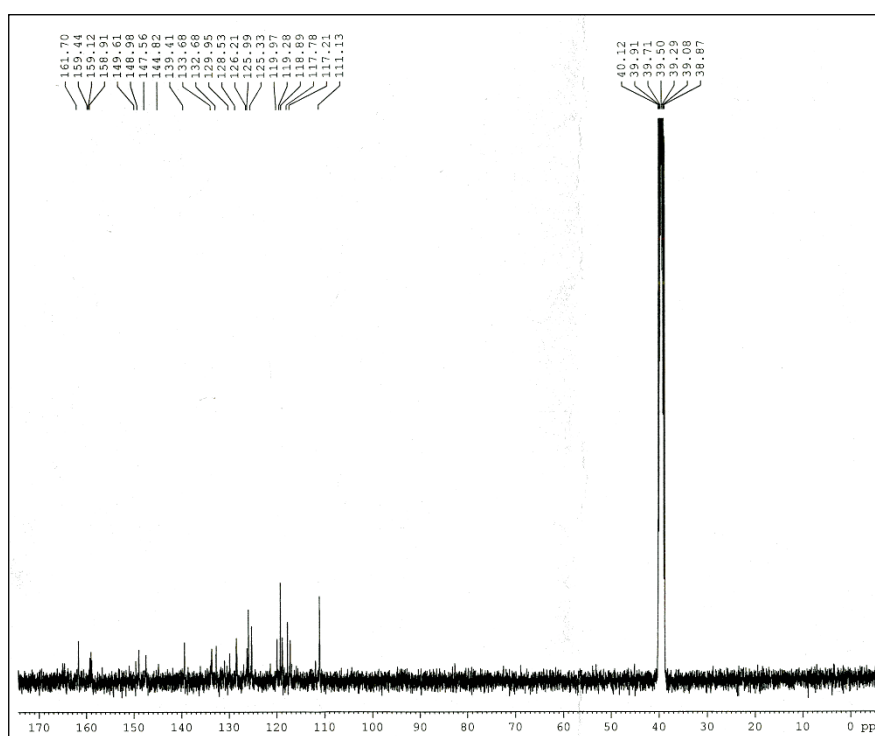

spectrum of BOHB

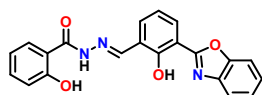

Figure S2:  $^{13}\text{C}$  NMR (100 MHz) spectrum of the probe (BOHB) in  $\text{DMSO-d}_6$

### 3. IR plot of BOHB

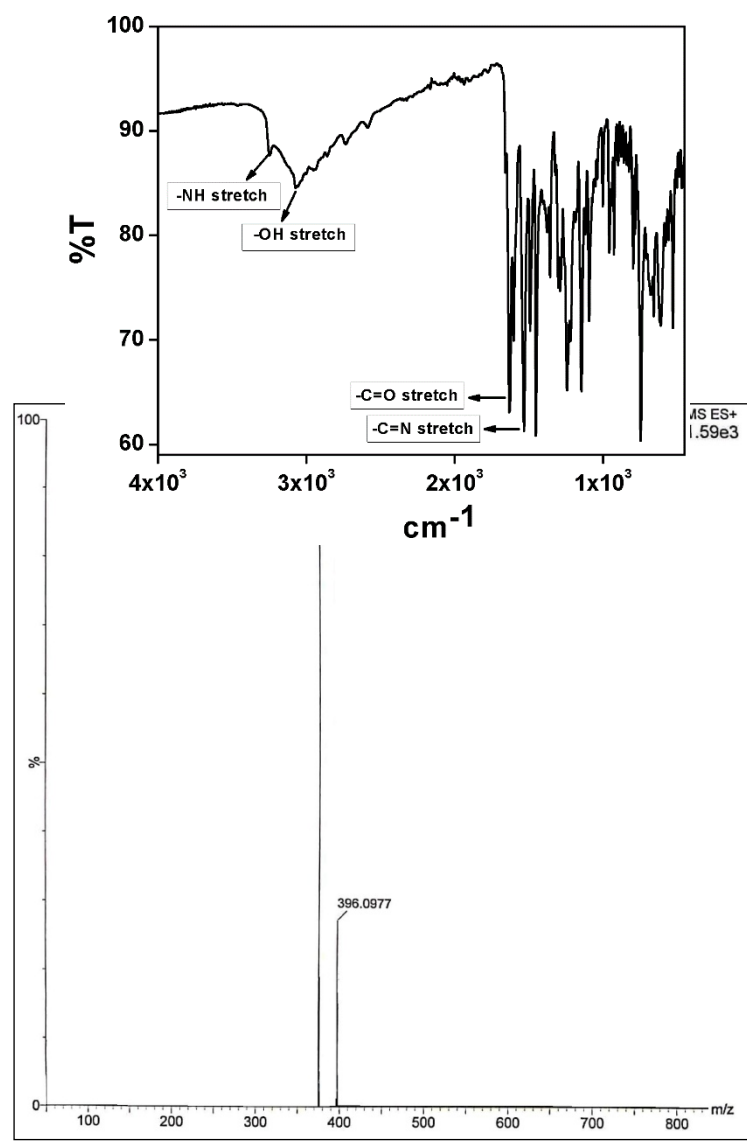

Figure S3: IR plot (BOHB)

### 4. Mass (HRMS)

of the probe

spectrum of BOHB

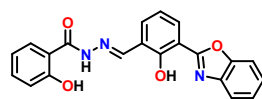

Calcd. for  $C_{21}H_{15}N_3O_4$   $[M + H]^+$   
 (m/z) = 373.1063; found = 374.1131

Figure S4: HRMS of the probe (BOHB)

### 5. $^1H$ NMR spectrum of BOHB-CN $^-$

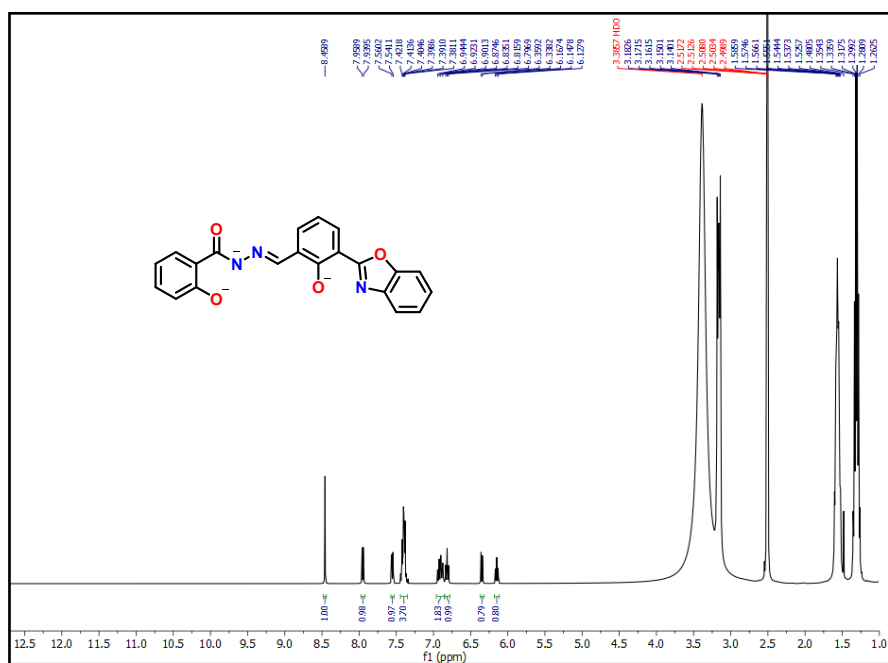

Figure S5:  $^1H$  NMR (400 MHz) spectrum of BOHB-CN $^-$  in DMSO-d $_6$

### 6. UV Study

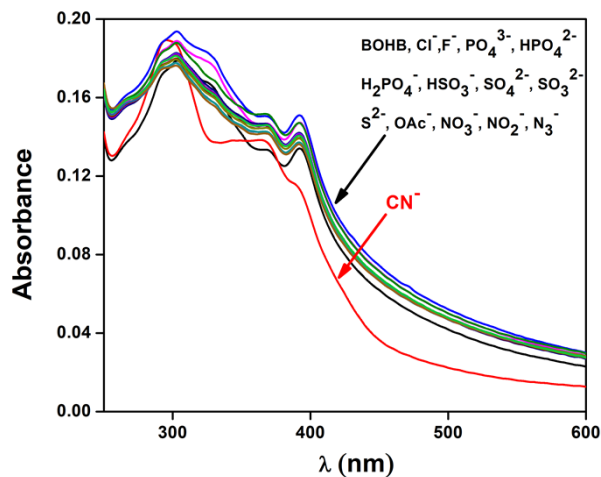

**Figure S6:** Absorption spectra of BOHB (10  $\mu\text{M}$ ) upon addition of various other anions (20  $\mu\text{M}$ ) in MeOH/H<sub>2</sub>O (1/1, v/v) using HEPES buffered solution at pH=7.2

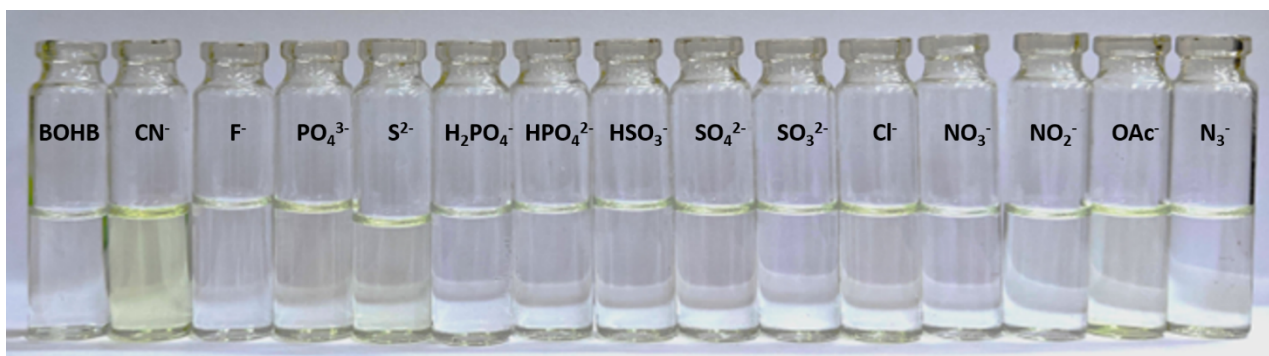

**Figure S7:** Color variations upon addition of different anions such as CN<sup>-</sup>, Cl<sup>-</sup>, F<sup>-</sup>, PO<sub>4</sub><sup>3-</sup>, H<sub>2</sub>PO<sub>4</sub><sup>-</sup>, HPO<sub>4</sub><sup>2-</sup>, HSO<sub>3</sub><sup>-</sup>, SO<sub>4</sub><sup>2-</sup>, SO<sub>3</sub><sup>2-</sup>, S<sup>2-</sup>, OAc<sup>-</sup>, NO<sub>3</sub><sup>-</sup>, NO<sub>2</sub><sup>-</sup> and N<sub>3</sub><sup>-</sup> into the probe solution in MeOH/H<sub>2</sub>O (1/1, v/v) in naked eye.

## 7. Emission Study

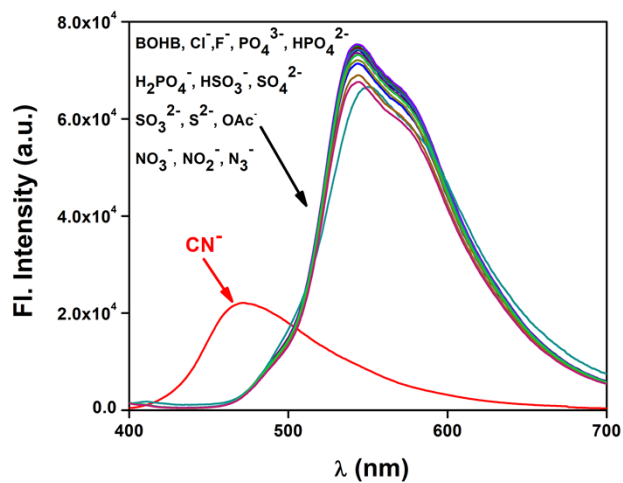

**Figure S8:** Change of emission spectra of BOHB (10  $\mu\text{M}$ ) after addition of other anions (20  $\mu\text{M}$ ) in MeOH/H<sub>2</sub>O (1/1, v/v) using HEPES buffered solution at pH=7.2.  $\lambda_{\text{ex}} = 368 \text{ nm}$ .

## 8. Mole ratio plot

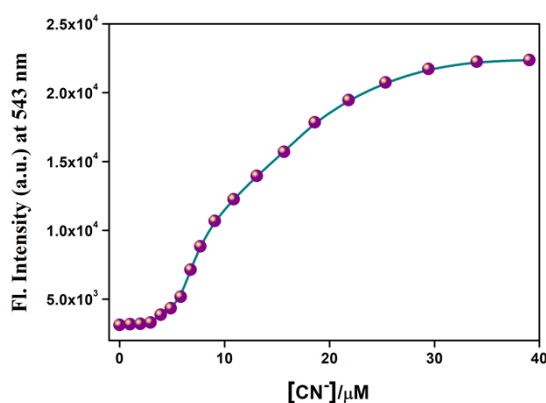

**Figure S9:** Plot of emission intensity at 543 nm of BOHB (10  $\mu\text{M}$ ) depending upon the  $\text{CN}^-$  concentration.

## 9. Determination of detection limit (LOD)

The limit of detection was determined based on the fluorescence titration. To determine the S/N ratio, the emission intensity of BOHB without  $\text{CN}^-$  was measured by 10 times and the standard deviation of blank measurements was determined. The detection limit (DL) of BOHB for  $\text{CN}^-$  was determined from the following equation:  $\text{DL} = K \times \text{Sb}_1/S$ , Where  $K = 2$  or  $3$  (we take 3 in this case);  $\text{Sb}_1$  is the standard deviation of the blank solution;  $S$  is the slope of the calibration curve.

We get the value of  $Sb_1$  as 0.531. Thus using the formula, we get the Detection Limit =  $(22.1 \pm 0.89) \mu\text{M}$  i.e. BOHB can detect  $\text{CN}^-$  in this minimum concentration by fluorescence techniques.

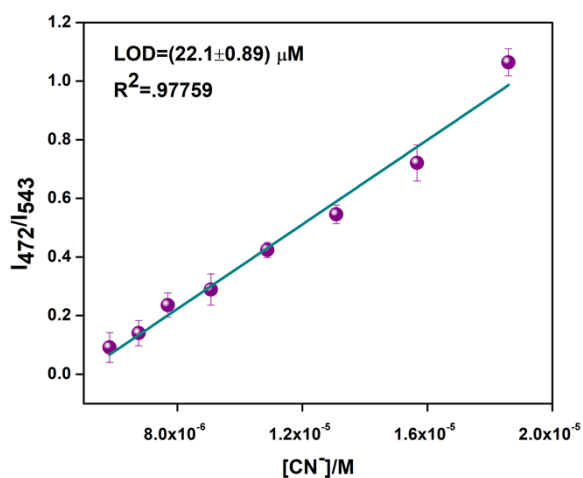

**Figure S10:** The linear response curve of emission intensity at  $I_{472}/I_{543}$  of BOHB depending on  $\text{CN}^-$  concentration.

### 10. pH study of BOHB and BOHB- $\text{CN}^-$

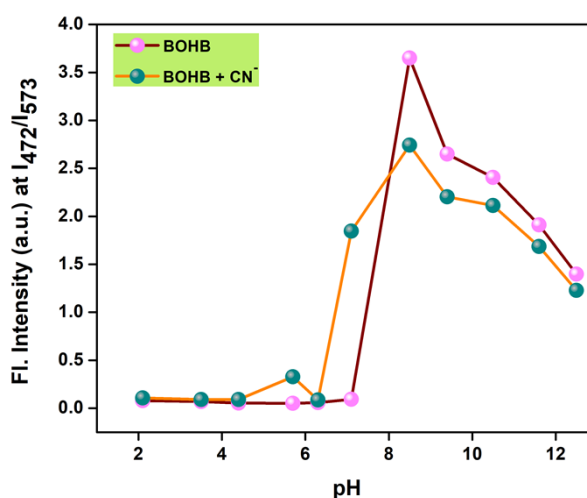

**Figure S11:** pH titration plot of BOHB and BOHB- $\text{CN}^-$ .

### 11. Stability study of BOHB and BOHB- $\text{CN}^-$

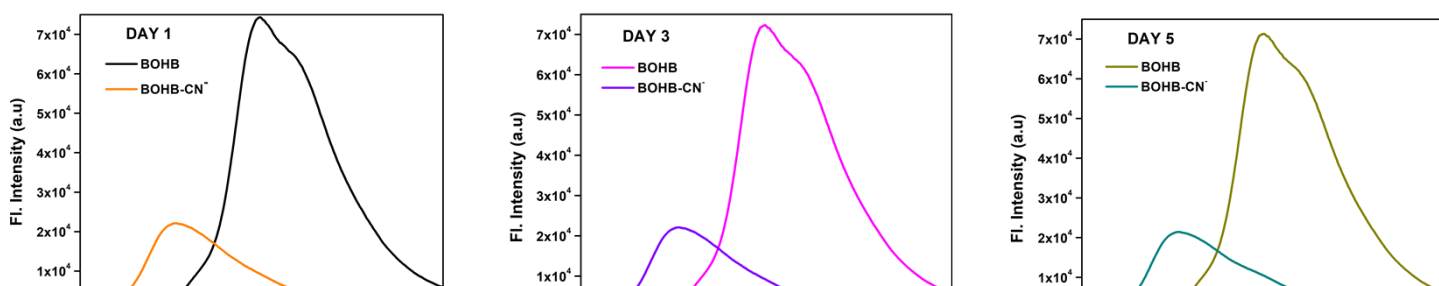

**Figure S12:** Fluorescence response of BOHB and BOHB-CN<sup>-</sup> over different days.

## 12. Determination of Quantum yield of BOHB and BOHB-CN<sup>-</sup>

For measurement of the quantum yields of BOHB and its reaction product with (BOHB-CN<sup>-</sup>), we recorded the absorbance of the compounds in DMSO solution. The emission spectra were recorded using the maximal excitation wavelengths and the integrated areas of the emission-corrected spectra were measured. The quantum yields were then calculated by comparison with quinine sulfate ( $\phi_s = 0.54$  in 0.5M H<sub>2</sub>SO<sub>4</sub>) as reference using the following equation:

$$\Phi_x = \Phi_s \times \left(\frac{I_x}{I_s}\right) \times \left(\frac{A_s}{A_x}\right) \times \left(\frac{n_x}{n_s}\right)^2$$

Where, x & s indicate the unknown and standard solution respectively,  $\Phi$  is the quantum yield, I is the integrated area under the fluorescence spectra, A is the absorbance and n is the refractive index of the solvent. We calculated the quantum yields of BOHB and BOHB-CN<sup>-</sup> using the above equation and the values are 0.245 and 0.098 respectively.

**Table S1: Lifetime decay profile of BOHB and BOHB-CN<sup>-</sup>**

| Methanol (Solvent)   | Quantum Yield | $\tau$ (ns) | $K_r$ ( $10^8 \times S^{-1}$ ) | $K_{nr}$ ( $10^8 \times S^{-1}$ ) |
|----------------------|---------------|-------------|--------------------------------|-----------------------------------|
| BOHB                 | 0.245         | 2.33        | 1.051                          | 3.241                             |
| BOHB-CN <sup>-</sup> | 0.098         | 0.92        | 1.065                          | 0.021                             |

**Table S2: The comparison of the present probe (BOHB) with some previous probes for CN<sup>-</sup>**

| Probe | Type of response | Response Time (min or | Solvent System | Detection limit | Reference |
|-------|------------------|-----------------------|----------------|-----------------|-----------|
|-------|------------------|-----------------------|----------------|-----------------|-----------|



|                                                                                     |                                                  |                   |                                        |                                    |     |
|-------------------------------------------------------------------------------------|--------------------------------------------------|-------------------|----------------------------------------|------------------------------------|-----|
|                                                                                     |                                                  | sec)              |                                        |                                    |     |
| 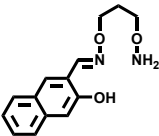   | colorimetric and fluorescent ratiometric turn-on | < 3 seconds       | DMSO/H <sub>2</sub> O, 9/1             | $2.16 \times 10^{-7}$ M            | [1] |
|    | Fluorescence turn-off                            | Within 20 seconds | Acetonitrile                           | $3.93 \times 10^{-8}$ M            | [2] |
|    | Ratiometric fluorescence change                  | Within 2 minutes  | DMSO/H <sub>2</sub> O, 1/1             | $2.1(\pm 0.0022) \times 10^{-8}$ M | [3] |
|   | Ratiometric fluorescence change                  | Within 22 seconds | DMSO/H <sub>2</sub> O, 40/60           | $(7.68 \pm 0.29) \times 10^{-8}$ M | [4] |
|  | Fluorescence turn-on                             | -                 | Acetonitrile                           | $1 \times 10^{-7}$ M               | [5] |
|  | Ratiometric fluorescence (blue shift)            | Within 1 second   | CH <sub>3</sub> CN/HEPES in water, 7/3 | $1.89 \times 10^{-7}$ M            | [6] |
|  | Ratiometric fluorescence change                  | Within 20 seconds | DMSO                                   | $(6.56 \pm 0.26) \times 10^{-8}$ M | [7] |
|  | Fluorescence turn-on                             | -                 | DMSO/H <sub>2</sub> O, 7/3             | $1.4 \times 10^{-7}$ M             | [8] |
|  | Fluorescence turn-on                             | -                 | THF                                    | $3.4 \times 10^{-8}$ M             | [9] |

|                                                                                     |                            |                   |                             |                               |              |
|-------------------------------------------------------------------------------------|----------------------------|-------------------|-----------------------------|-------------------------------|--------------|
| 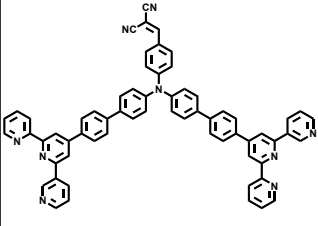   | Fluorescence quenching     | -                 | H <sub>2</sub> O/THF, 9:1   | $3.8 \times 10^{-6}$ M        | [10]         |
|    | Fluorescence quenching     | -                 | DMSO/H <sub>2</sub> O, 1/99 | $2.95 \times 10^{-8}$ M       | [11]         |
|    | Fluorometric turn-off      | 15 seconds        | DMSO/H <sub>2</sub> O, 1/99 | $2.26 \times 10^{-7}$ M       | [12]         |
|   | Fluorometric (turn-off)    | -                 | MeOH/H <sub>2</sub> O, 4/1  | $1.3 \times 10^{-7}$ M        | [13]         |
|  | Fluorometric (turn-on)     | -                 | DMSO                        | $7.0 \times 10^{-8}$ M        | [14]         |
|  | Fluorometric (turn-on)     | Within 8 minutes  | DMSO/H <sub>2</sub> O, 8/2  | $2.65 \times 10^{-7}$ M       | [15]         |
|  | Fluorometric (ratiometric) | Almost 15 seconds | MeOH/H <sub>2</sub> O, 1/1  | $(22.1 \pm 0.89) \mu\text{M}$ | Present Work |

## References:

1. Z.-Z. Chen, R.-Y. Li, W.-Z. Zhang, Y. Zhang and W.-K. Dong, *New J. Chem.*, 2020, **44**, 21038.
2. S. Manickam and S. Kulathu Iyer, *RSC Adv.*, 2020, **10**, 11791.
3. S. Banerjee, M. Mandal, S. Halder, A. Karak, D. Banik, K. Jana and A. K. Mahapatra, *Anal. Methods*, 2022, **14**, 3209.

4. A. Maji, A. Biswas, A. Das, S. Gharami, K. Aich and T. K. Mondal, *New J. Chem.*, 2023, **47**, 11557.
5. W. Luo, Z. Yuwen, H. Li and S. Pu, *New J. Chem.*, 2022, **46**, 2411.
6. S. Munusamy, S. Swaminathan, D. Jothi, V. P. Muralidharan and S. K. Iyer, *RSC Adv.*, 2021, **11**, 15656.
7. A. Biswas, R. Mukherjee, A. Maji, R. Naskar, K. Aich, N. Murmu and T. K. Mondal, *Sens. Diagn.*, 2024, **3**, 1201.
8. S. Malkondu, S. Erdemirand and S. Karakurt, *Dyes Pigm.*, 2020, **174**, 108019.
9. T. S. Reddy, H. Moon and M.-S. Choi, *Spectrochim Acta A.*, 2021, **252**, 119535.
10. Y. Li, Z. Gu, T. He, X. Yuan, Y. Zhang, Z. Xu, H. Qiu, Q. Zhang and S. Yin, *Dyes Pigm.*, 2020, **173**, 107969.
11. B. Zuo, L. Liu, X. Feng, D. Li, W. Li, M. Li, M. Huang and Q. Deng, *Dyes Pigm.*, 2021, **193**, 109534.
12. Q. Zou, J. Du, C. Gu, D. Zhang, F. Tao and Y. Cui, *J. Photochem. Photobiol. A. Chem.*, 2021, **405**, 112993.
13. R. Mehta and V. Luxami, *ChemistrySelect*, 2020, **5**, 13429.
14. K. Satheeshkumar, P. Saravanakumar, A. Kalavathi, K. N. Vennila, K. P. Elango, *Spectrochim Acta A.*, 2023, **302**, 123054.
15. B. Tavakoli, S. Meghdadi, Z. Salarvand, K. Eskandari, A. Amiri and M. Amirnasr, *J. Photochem. Photobiol. A. Chem.*, 2023, **440**, 114661.
